# Supplementary material for: Genetically-engineered protein prodrug-like nanoconjugates for tumor-targeting biomimetic delivery via a SHEATH strategy
Source: Royal Society of Chemistry journal article supplement (doi:10.1039/c8nr08951e), 2018-12-17
Supplement: c8nr08951e1.pdf [file c8nr08951e1.pdf]

## Supporting Information

### Genetically-Engineered Protein Prodrug-like Nanoconjugates for Tumor-Targeting Biomimetic Delivery via a SHEATH Strategy

Ya Chang <sup>1,2</sup>, Shuo Yao <sup>1,3</sup>, Yifang Chen <sup>1</sup>, Jingjing Huang <sup>1,2</sup>, Aihua Wu <sup>1</sup>, Meng  
Zhang <sup>1,3</sup>, Fan Xu <sup>1,2</sup>, Feng Li <sup>4</sup>, Yongzhuo Huang <sup>1,3,\*</sup>

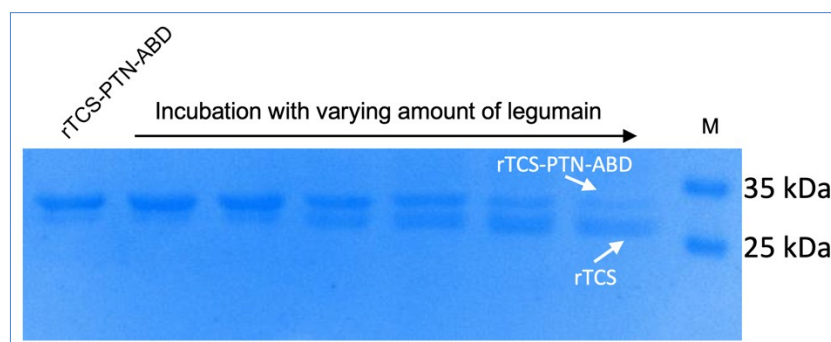

**Figure S1** Legumain-mediated cleavage of rTCS-PTN-ABD determined by SDS-PAGE analysis.

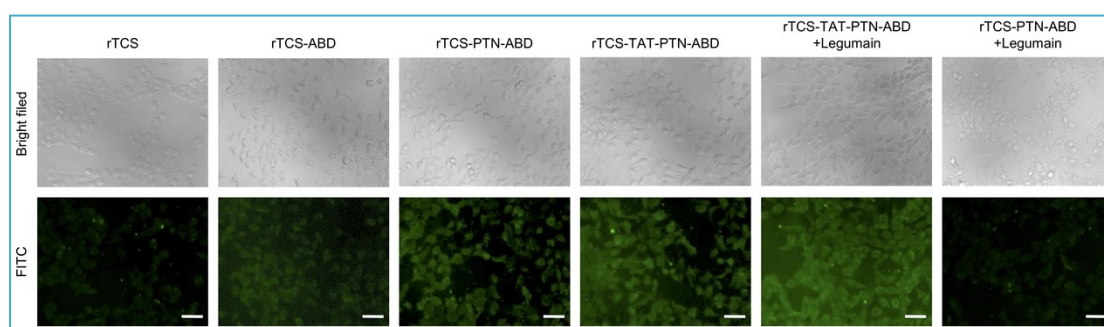

**Figure S2** Cellular uptake of protein toxins in 4T1 cells, Scale bar, 50  $\mu$ m.

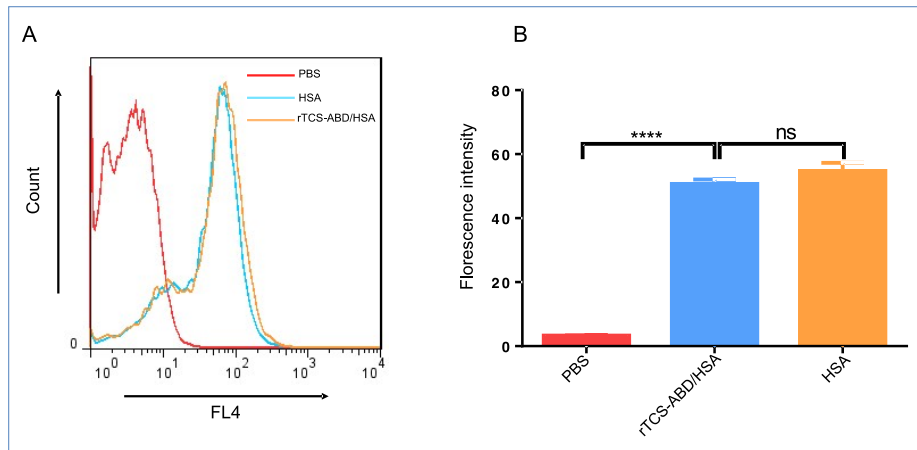

**Figure S3** The influence of ABD to albumin cellular uptake.

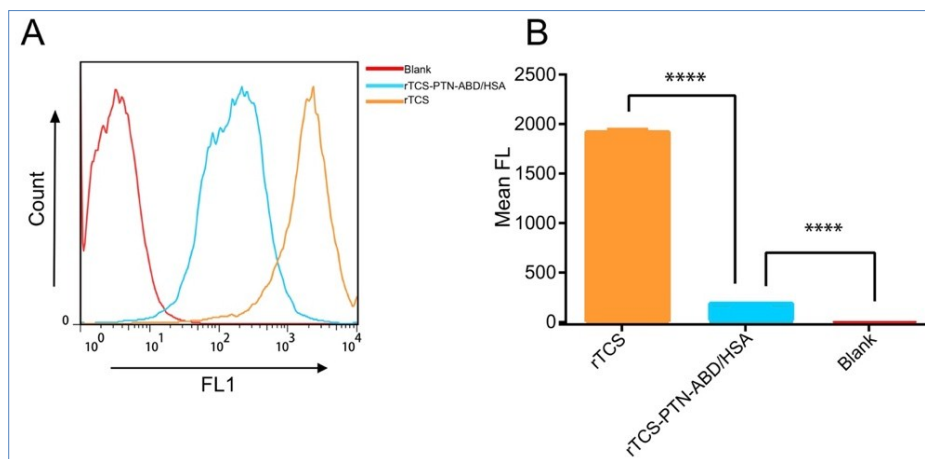

**Figure S4** The cellular uptake by the blood monocyte macrophages (RAW 264.7). The conjugates of rTCS-PTN-ABD/HSA showed the reduced cellular capture.

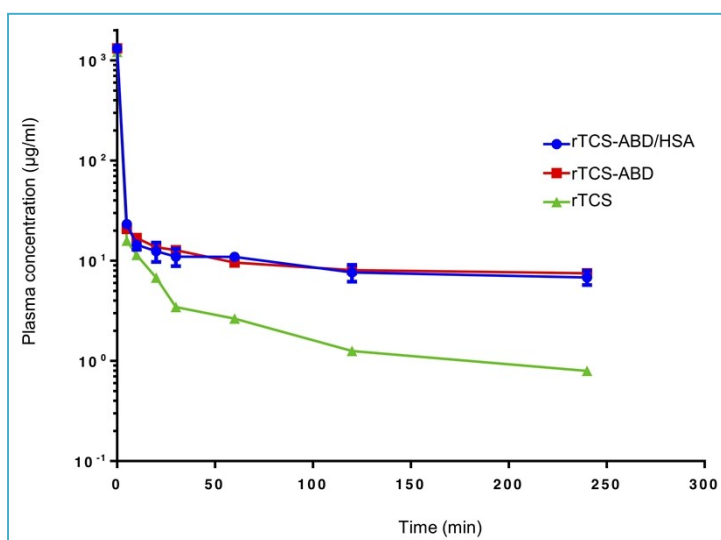

**Figure S5** Plasma concentration-time profile of rTCS, rTCS-ABD, and the pre-formed nanoconjugates of rTCS-ABD/HSA measured in rats.

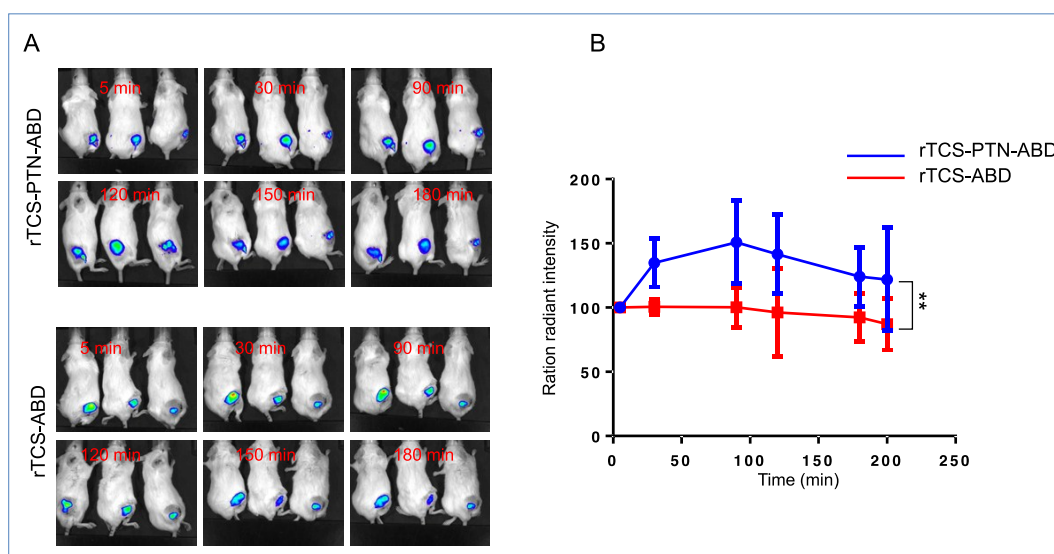

**Figure S6** The intratumor legumain-activated measurement. rTCS-PTN-ABD was labeled with Cy5 and HSA labeled with QSY21. The increased fluorescence intensity indicated the legumain-mediated cleavage and the release of TCS.

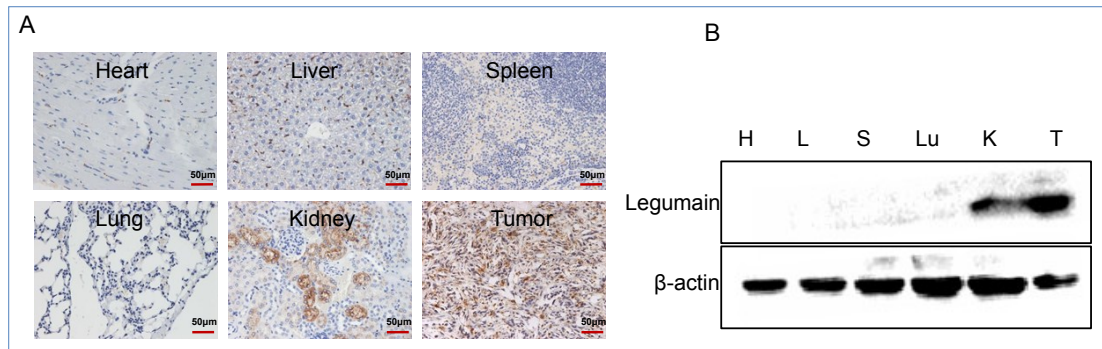

**Figure S7** Legumain expression in different tissues detected by immunohistochemical staining (A) and Western blotting (B).

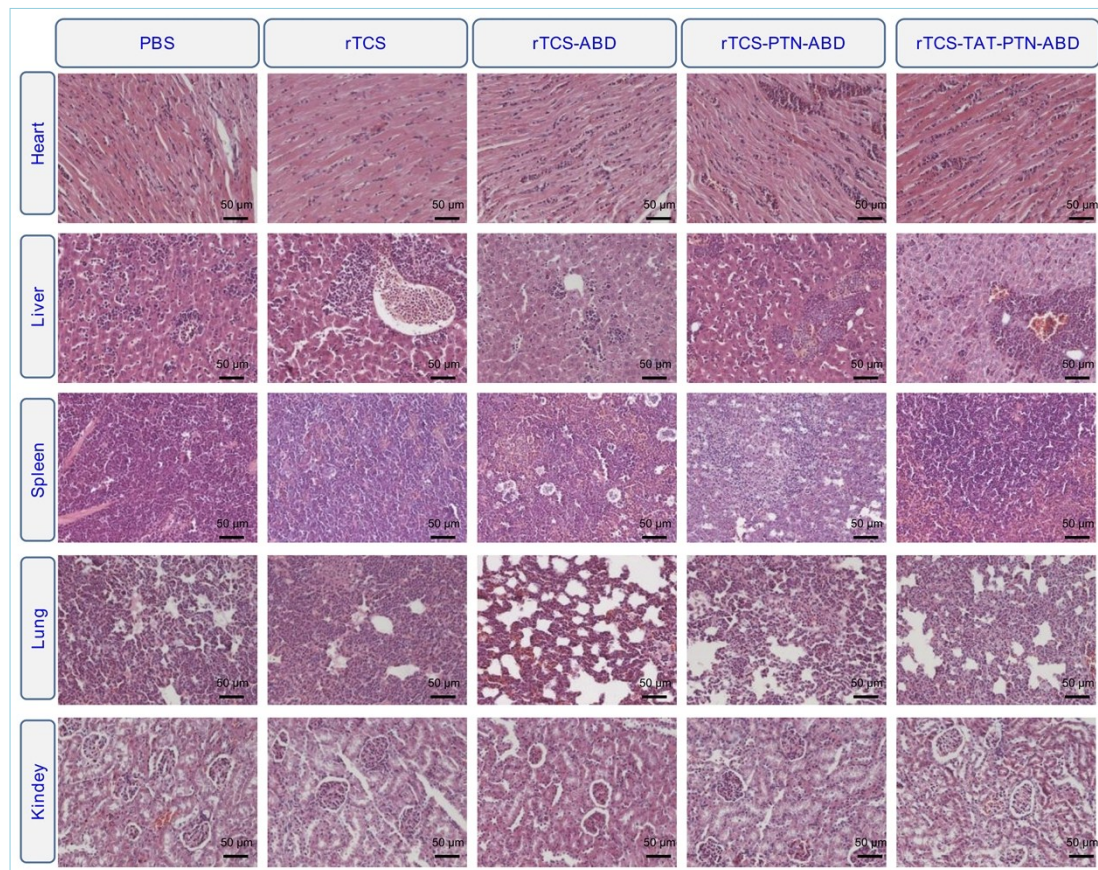

**Figure S8** Histochemical examination of major organs dissected from the mice after treatment. Scale bar, 50 μm.
